# Supplementary material for: Historical Floras: addressing their genesis in order to be viewed from a modern-day perspective. A case study from Northern Italy
Source: Springer Nature journal article supplement (doi:10.1007/s12210-022-01116-2), 2022-12-02
Supplement: MOESM3 [file 12210_2022_1116_MOESM3_ESM.pdf]

ELECTRONIC SUPPLEMENTARY MATERIAL 3

***Historical Floras: addressing their genesis in order to be viewed from a modern-day perspective. A case study from Northern Italy***

Rendiconti Lincei. Scienze Fisiche e Naturali

Fabrizio Buldrini<sup>1</sup>, Alessandro Alessandrini<sup>2</sup>, Enrico Muzzi<sup>3</sup>, Patrik Krebs<sup>4</sup>, Marco Conedera<sup>4</sup>, Giovanna Pezzi<sup>1</sup>

<sup>1</sup> BIOME Lab – Department of Biological, Geological, and Environmental Sciences, Alma Mater Studiorum Università di Bologna. Via Irnerio 42, 40126 Bologna, Italy

<sup>2</sup> Independent researcher (ales.alessandrini@gmail.com)

<sup>3</sup> Department of Agricultural and Food Sciences, Alma Mater Studiorum Università di Bologna. Viale G. Fanin 44, 40127 Bologna, Italy

<sup>4</sup> Swiss Federal Institute for Forest, Snow and Landscape Research WSL. Insubric Ecosystems Group, a Ramèl 18, CH-6593 Cadenazzo, Switzerland

[fabrizio.buldrini@unibo.it](mailto:fabrizio.buldrini@unibo.it)

List of the contributors (in alphabetical order) besides Girolamo Cocconi to the Flora of the province of Bologna (1883), and related information. Type of contributor (P = academic scholars, professors or directors of botanic gardens; A = non-academic plant collectors, such as enthusiasts of botany and local collectors) and number of records belonging to each contributor are also provided.

\*: floristic records are given together with those by P.R. Pirotta, with whom he worked as a colleague

\*\* : floristic records are given together with those by D. Lorenzini, his brother, with whom he explored the territory

\*\*\*: floristic records are given together with those by G. Riva, his brother, with whom he explored the territory.

| Surname    | Name              | Anagraphical data                           | Bioskecth                                                                                                                                                                                | Bibliography                                                                                                                                                           | Contributor type | Floristic records (n.) |
|------------|-------------------|---------------------------------------------|------------------------------------------------------------------------------------------------------------------------------------------------------------------------------------------|------------------------------------------------------------------------------------------------------------------------------------------------------------------------|------------------|------------------------|
| Baldacci   | Antonio           | Bologna, 1867 – Bologna, 1950               | Degree in Veterinary Medicine (date 27-6-1891). Botanist and geographer, Assistant Professor in the Botanic Garden of Bologna                                                            | Archivio Storico dell'Università di Bologna ( <a href="https://archiviostorico.unibo.it/it">https://archiviostorico.unibo.it/it</a> ), Saccardo (1895), Bollini (2005) | P                | 21                     |
| Bassi      | Ferdinando        | Bologna, 1710 – Bologna, 1774               | Botanist, Director of the Garden of Exotic Plants of Bologna, correspondent of Linnaeus                                                                                                  | Managlia and Mossetti (2008)                                                                                                                                           | P                | 1                      |
| Beccari    | Odoardo           | Firenze, 1843 – Firenze, 1920               | Explorer, geographer, naturalist and botanist, Director of the Istituto Botanico and Museo Botanico of Florence from 1878                                                                | Alippi Cappelletti and De Leone (1970)                                                                                                                                 | P                | 3                      |
| Bertoloni  | Antonio (senior)  | Sarzana (SP), 1775 – Bologna, 1869          | Professor of Botany in Bologna from 1816 to 1837, author of the <i>Flora Italica</i> (Bertoloni, 1833-1854)                                                                              | Mazzetti (1841), Parlatore (1869), Mattiuzzi (1927), Giacomini (1967), Gasnault (2001)                                                                                 | P                | 913                    |
| Bertoloni  | Giuseppe          | Sarzana (SP), 1804 – Bologna, 1878          | Professor of Botany in Bologna from 1837 to 1878                                                                                                                                         | Mazzetti (1841), Mattiuzzi (1927), Gasnault (2001)                                                                                                                     | P                | 355                    |
| Bertoloni  | Antonio (junior)  | Bologna, 1843 – Zola Predosa (BO), 1930     | Director of a botanical-agricultural institute near Bologna                                                                                                                              | Saccardo (1895), Buscalioni (1930)                                                                                                                                     | A                | 2                      |
| Bianconi   | Gian Giuseppe     | Bologna, 1809 – Bologna, 1878               | Professor of Zoology and Mineralogy in Bologna up to 1861                                                                                                                                | Mazzetti (1841), Mattiuzzi (1927), Gasnault (2001)                                                                                                                     | P                | 1                      |
| Breventani | Camillo           | Bologna, 1810 – Bologna, 1898               | Priest, director of the Istituto «Ritiro e Scuola di San Pellegrino»                                                                                                                     | Annuario Ecclesiastico 1898, <a href="http://www.ritirosanpellegrino.it/chi.htm">http://www.ritirosanpellegrino.it/chi.htm</a>                                         | A                | 2                      |
| Caldesi    | Ludovico          | Faenza (RA), 1821 – Faenza (RA), 1884       | Amateur botanist, author of the <i>Florae Faventinae Tentamen</i> and of the <i>Primulaceae</i> in the <i>Flora Italiana</i> by Filippo Parlatore                                        | Monsagrati (1973)                                                                                                                                                      | A                | 1                      |
| Caruel     | Teodoro           | Chandernagor (India), 1830 – Florence, 1898 | Professor of Botany in Florence (1863-1871), Pisa (1871-1880) and Florence again (1880-1892), continuator of the <i>Flora Italiana</i> by Filippo Parlatore                              | Alippi Cappelletti (1977)                                                                                                                                              | P                | 69                     |
| Cavara     | Fridiano          | Mongardino (BO), 1857 – Naples, 1929        | Professor of Botany in Pavia (1886-1896), Vallombrosa (FI, 1896-1901), Cagliari (1901-1903), Catania (1903-1906), Naples (1906-1929)                                                     | Giacomini (1979)                                                                                                                                                       | P                | 45                     |
| Comelli    | Giovanni Battista | Bologna, 1840 – ?, 1916                     | Engineer in Bologna, author of some historical news about the local floristic researchers                                                                                                | Saccardo (1895)                                                                                                                                                        | A                | 41                     |
| Cugini     | Gino              | Bagnone (MS), 1852 – Modena, 1907           | Degree in Natural Sciences (date: 19-7-1875). Assistant Professor of Botany in Modena from 1880 to 1887, Director of the Regia Stazione Sperimentale Agraria di Modena from 1887 to 1907 | Macchiati (1908), Archivio Storico dell'Università di Bologna ( <a href="https://archiviostorico.unibo.it/it">https://archiviostorico.unibo.it/it</a> )                | P                | 29                     |

|               |                 |                                                                   |                                                                                                                                                                                                                                                                                                                                                         |                                                                                                                                                     |   |       |
|---------------|-----------------|-------------------------------------------------------------------|---------------------------------------------------------------------------------------------------------------------------------------------------------------------------------------------------------------------------------------------------------------------------------------------------------------------------------------------------------|-----------------------------------------------------------------------------------------------------------------------------------------------------|---|-------|
| Farneti       | Rodolfo         | Lizzano in Belvedere (BO), 1859 – Lizzano in Belvedere (BO), 1919 | Bryologist, mycologist, plant pathologist, Conservator of the botanical collections and the herbarium of the University of Pavia from 1886, Assistant Professor of the laboratory of cryptogamic botany in Pavia                                                                                                                                        | Saccardo (1895), Govi (1995)                                                                                                                        | P | 16    |
| Gaddi         | ?               | ?, ? – ?, ?                                                       | Probably Gaetano, professor of Veterinary Anatomy and Veterinary Jurisprudence in Bologna                                                                                                                                                                                                                                                               | Calendario Generale del Regno d'Italia (1878)                                                                                                       | A | 1     |
| Giannitrapani | Domenico        | Trapani, 1836 – Firenze, 1916                                     | Engineer and geographer, official of the army's genius, who worked in the province of Bologna from the late 1870s until 1892                                                                                                                                                                                                                            | Pizzaleo (2000)                                                                                                                                     | A | 10    |
| Gibelli       | Giuseppe        | Santa Cristina (PV), 1831 – Turin, 1898                           | Professor of Botany in Modena from 1875 to 1879, Professor of Botany and Director of the Botanic Garden of Bologna from 1879 to 1883, Professor of Botany in Turin from 1883 to 1898; first discoverer and descriptor of the mycorrhizae                                                                                                                | Rossi (2000), Alessandrini et al. (2010)                                                                                                            | P | 98*   |
| Giovannini    | Filippo         | ?, ? – ?, ?                                                       | Degree in Medicine and Surgery (date: 25-7-1871); guardian of the Botanic Garden of Bologna                                                                                                                                                                                                                                                             | Cocconi (1880), Archivio Storico dell'Università di Bologna ( <a href="https://archivistorico.unibo.it/it">https://archivistorico.unibo.it/it</a> ) | A | 1     |
| Lorenzini     | Amilcare        | Porretta Terme (BO), 1840 – ?, 1916                               | Degree in Pharmacy (date: 23-7-1869)                                                                                                                                                                                                                                                                                                                    | Archivio Storico dell'Università di Bologna ( <a href="https://archivistorico.unibo.it">https://archivistorico.unibo.it</a> ), CAI Bologna (1881)   | A | 136** |
| Lorenzini     | Demetrio        | Porretta Terme (BO), 1834 – Porretta Terme (BO), 1910             | Pharmacist, geologist and botanist                                                                                                                                                                                                                                                                                                                      |                                                                                                                                                     | A | **    |
| Mattei        | Giovanni Ettore | Castelfranco Emilia (MO), 1865 – Sciarra (PA), 1943               | Assistant professor of Botany in Bologna from 1885 to 1897 and in Palermo from 1905 to 1925, then Director of the Istituto Botanico and the Botanic Garden in Messina                                                                                                                                                                                   | Bronzo et al. (2012)                                                                                                                                | P | 7     |
| Minelli       | ?               | ?, ? – ?, ?                                                       | Probably Riccardo, assistant and substitute director of the Surgical Clinic of the University of Bologna                                                                                                                                                                                                                                                | Annuario della Regia Università di Bologna, anno scolastico 1881-82                                                                                 | A | 2     |
| Pirazzoli     | Odoardo         | Imola (BO), 1815 – Imola (BO), 1884                               | Philosophy and Engineering degree. Scholar and collector of Natural Sciences, particularly botany and entomology. In 1857 he contributed to the foundation of the Gabinetto di storia naturale di Imola, first nucleus of today's Musei Civici: he donated his own scientific collections and books, to which, during his life, he added some own works | <a href="http://www.archivistorico.comune.imola.bo.it/">http://www.archivistorico.comune.imola.bo.it/</a>                                           | A | 23    |
| Pirotta       | Pietro Romualdo | Pavia, 1853 – Rome, 1936                                          | Director of the Botanic Garden of Modena from 1880 to 1883, Professor of Botany in Rome from 1883 to 1928                                                                                                                                                                                                                                               | Alessandrini et al. (2010)                                                                                                                          | P |       |

|           |           |                                                         |                                                                                                                                                                                                                                                                                                                                                                                                                                                                                                      |                                                                      |   |        |
|-----------|-----------|---------------------------------------------------------|------------------------------------------------------------------------------------------------------------------------------------------------------------------------------------------------------------------------------------------------------------------------------------------------------------------------------------------------------------------------------------------------------------------------------------------------------------------------------------------------------|----------------------------------------------------------------------|---|--------|
| Pizzini   | ?         | ?, ? – ?, ?                                             | ?                                                                                                                                                                                                                                                                                                                                                                                                                                                                                                    |                                                                      | A | 3      |
| Riva      | Domenico  | Salto di Montese (MO),<br>1856 – ?, 1895                | Professor of Botany in Rome, explorer of the African<br>flora as a member of Prince Eugenio Ruspoli's<br>expeditions                                                                                                                                                                                                                                                                                                                                                                                 | Alessandrini et al. (2010), Bronzo et al. (2012)                     | P | 249*** |
| Riva      | Giuseppe  | Salto di Montese (MO),<br>1845 – Fiumalbo (MO),<br>1909 | Domenico's brother, collaborator to the floristic<br>research in the province of Modena                                                                                                                                                                                                                                                                                                                                                                                                              | Managlia (2006), Alessandrini et al. (2010),<br>Bronzo et al. (2012) | A | ***    |
| Saccenti  | Cesare    | Bologna, 1837 – Bologna,<br>1894                        | Plant collector in the province of Bologna                                                                                                                                                                                                                                                                                                                                                                                                                                                           | Saccardo (1895)                                                      | A | 77     |
| Savi      | Pietro    | Pisa, 1811 – Pisa, 1871                                 | Professor of Botany in Pisa from 1836 and Director of<br>the Botanic Garden of Pisa from 1842                                                                                                                                                                                                                                                                                                                                                                                                        | Buldrini et al. (2016)                                               | P | 1      |
| Tassinari | Giacomo   | Castel Bolognese (BO),<br>1812 – Solarolo (RA),<br>1900 | Pharmacy degree. Director of the pharmacy of the<br>Ospedale di Santa Maria della Scaletta (Imola) in 1837.<br>He was a friend of Odoardo Pirazzoli and in 1857, with<br>him and other naturalists from Imola, contributed to the<br>foundation of the Gabinetto di storia naturale di Imola,<br>then Museo civico, donating to the «pubblico ginnasio»<br>his own scientific collections. He donated, together<br>with Pirazzoli, a herbarium of 4000 species, nearly all<br>of national provenance | Galli (1941)                                                         | A | 1      |
| Vitman    | Fulgenzio | Florence, 1728 – Milan,<br>1806                         | Monk of the Vallombrosa order, founder of the botanic<br>gardens of Pavia (1773) and Brera (Milan, 1774),<br>author of the <i>Saggio dell'istoria erbaria delle Alpi di<br/>Pistoia, Modena e Lucca</i> (Vitman, 1773)                                                                                                                                                                                                                                                                               | Visconti (2012)                                                      | P | 10     |
| Zuffi     | D.        | ?, ? – ?, ?                                             | ?                                                                                                                                                                                                                                                                                                                                                                                                                                                                                                    |                                                                      | A | 5      |

## BIBLIOGRAPHY

Alessandrini A, Delfini L, Ferrari P, Fiandri F, Gualmini M, Lodesani U, Santini C (2010) Flora del Modenese. Censimento. Analisi. Tutela. Provincia di Modena, Istituto Beni Culturali della Regione Emilia-Romagna. ARTESTAMPA srl, Modena

Alippi Cappelletti M (1977) Teodoro Caruel. Enciclopedia Italiana Treccani – Dizionario Biografico degli Italiani, vol. 20. Available at [http://www.treccani.it/enciclopedia/teodoro-caruel\\_\(Dizionario-Biografico\)/](http://www.treccani.it/enciclopedia/teodoro-caruel_(Dizionario-Biografico)/)

Alippi Cappelletti M, De Leone E (1970) Odoardo Beccari. Enciclopedia Italiana Treccani — Dizionario Biografico degli Italiani, vol. 7. Available at [http://www.treccani.it/enciclopedia/odoardo-beccari\\_\(Dizionario-Biografico\)/](http://www.treccani.it/enciclopedia/odoardo-beccari_(Dizionario-Biografico)/)

Bollini MG (2005) Una passione balcanica tra affari, botanica e politica coloniale. Il fondo Antonio Baldacci nella Biblioteca dell'Archiginnasio (1884-1950). Biblioteca de l'Archiginnasio, ser. III, vol. 4. Comune di Bologna, Bologna

Bronzo E, Santangelo A, Alessandrini A (2012) Raccolte emiliane nell'Erbario di Napoli: le collezioni Mattei e Riva. *Inf Bot Ital* 44, suppl. 1: 33–48

Buldrini F, Bosi G, Circelli M, Bandini Mazzanti M (2016) Le lettere dei Savi a Giovanni de' Brignoli di Brünnhoff: uno spaccato di botanico della prima metà dell'Ottocento italiano. *Atti Soc Nat Nat. Modena* 147: 205-228

Buscalioni L (1930) Un botanico bolognese. Antonio Bertoloni junior. *Il Comune di Bologna, rivista mensile municipale* 5:57-61

CAI Bologna (1881) Club Alpino Italiano – Sezione di Bologna, «L'Appennino Bolognese. Descrizioni e itinerari». Bologna, Tipografia Fava e Garagnani

Cocconi G (1880) Quarto contributo alla flora della provincia di Bologna. *Mem Accad Sci Ist Bologna*, ser. IV, t. I: 210–233

Galli R (1941) Giacomo Tassinari (1811-1900). *Il Resto del Carlino*, 10-8-1941. Available at <http://www.castelbolognese.org/biografie-personaggi/personaggi/giacomo-tassinari/> (accessed on 1-10-2021)

Gasnault F (2001) La cattedra, l'altare, la nazione: carriere universitarie nell'Ateneo di Bologna, 1803-1859. Bologna, CLUEB (trad. S. Mambrini)

Giacomini V (1967) Antonio Bertoloni. Enciclopedia Italiana Treccani – Dizionario Biografico degli Italiani, vol. 9. Available at [http://www.treccani.it/enciclopedia/antonio-bertoloni\\_\(Dizionario-Biografico\)/](http://www.treccani.it/enciclopedia/antonio-bertoloni_(Dizionario-Biografico)/)

Giacomini V (1979) Fridiano Cavara. Enciclopedia Italiana Treccani – Dizionario Biografico degli Italiani, vol. 23. Available at [http://www.treccani.it/enciclopedia/fridiano-cavara\\_\(Dizionario-Biografico\)/](http://www.treccani.it/enciclopedia/fridiano-cavara_(Dizionario-Biografico)/)

Govi G (1995) Rodolfo Farneti. Enciclopedia Italiana Treccani — Dizionario Biografico degli Italiani, vol. 45. Available at [http://www.treccani.it/enciclopedia/rodolfo-farneti\\_\(Dizionario-Biografico\)/](http://www.treccani.it/enciclopedia/rodolfo-farneti_(Dizionario-Biografico)/)

Macchiati L (1908) Cenzo Bio-Bibliografico del Prof. Gino Cugini. *Atti Soc Nat Mat Modena*, ser. IV, vol. X: 3–22

Managlia A (2006) Domenico Riva, botanico ed esploratore montesino. *Rass Frignanese* 36:441–451

Managlia A, Mossetti U (2008) Ferdinando Bassi, Linnaeus's correspondent from Bologna. *The Linnaean* 24(3):19–25

Mattiuzzi E (1927) Alcuni cenni sul prof. Antonio Bertoloni naturalista, medico e matematico e sulla famiglia di lui. *Il Comune di Bologna* 9-10. *Tip. Mareggiani*, Bologna

Mazzetti S (1841) Memorie storiche sopra l'Università e l'Istituto delle Scienze di Bologna. Bologna, Tipografia San Tommaso d'Aquino

Monsagrati G (1973) Ludovico Caldesi. Enciclopedia Italiana Treccani - Dizionario Biografico degli Italiani, vol. 16. Available at [http://www.treccani.it/enciclopedia/ludovico-caldesi\\_\(Dizionario-Biografico\)/](http://www.treccani.it/enciclopedia/ludovico-caldesi_(Dizionario-Biografico)/)

Parlatore F (1869) Cenni necrologici di Antonio Bertoloni. N Giorn Bot Ital 1:149–157

Pizzaleo A (2000) Domenico Giannitrapani. Enciclopedia Italiana Treccani – Dizionario Biografico degli Italiani, vol. 54. Available at [http://www.treccani.it/enciclopedia/domenico-giannitrapani\\_\(Dizionario-Biografico\)/](http://www.treccani.it/enciclopedia/domenico-giannitrapani_(Dizionario-Biografico)/)

Rossi M (2000) Giuseppe Gibelli. Enciclopedia Italiana Treccani – Dizionario Biografico degli Italiani, vol. 54. Available at [http://www.treccani.it/enciclopedia/giuseppe-gibelli\\_\(Dizionario-Biografico\)/](http://www.treccani.it/enciclopedia/giuseppe-gibelli_(Dizionario-Biografico)/)

Saccardo PA (1895) La Botanica in Italia. Materiali per la storia di questa scienza. Venezia, Tipografia Carlo Ferrari

Visconti A (2012) La fondazione dell'Orto botanico di Brera e gli anni della direzione dell'abate vallombrosano Fulgenzio Vitman (1728-1806) tra assolutismo asburgico ed età napoleonica. Atti Soc it Sci nat Museo civ Stor nat Milano 153(I):27–48
